# Supplementary material
Source: publisher figshare collection journal article supplement (https://rs.figshare.com/ndownloader/files/17890664)

Supplementary Figure 5. Multispecies coalescent topology of the 90% complete dataset of all possible quartets from SVDqartets with 100 BS support. Black circles indicate  $\geq 95\%$ , grey circles indicate  $\geq 75\text{--}94\%$ , and white indicate  $\leq 74\%$  bootstrap support.

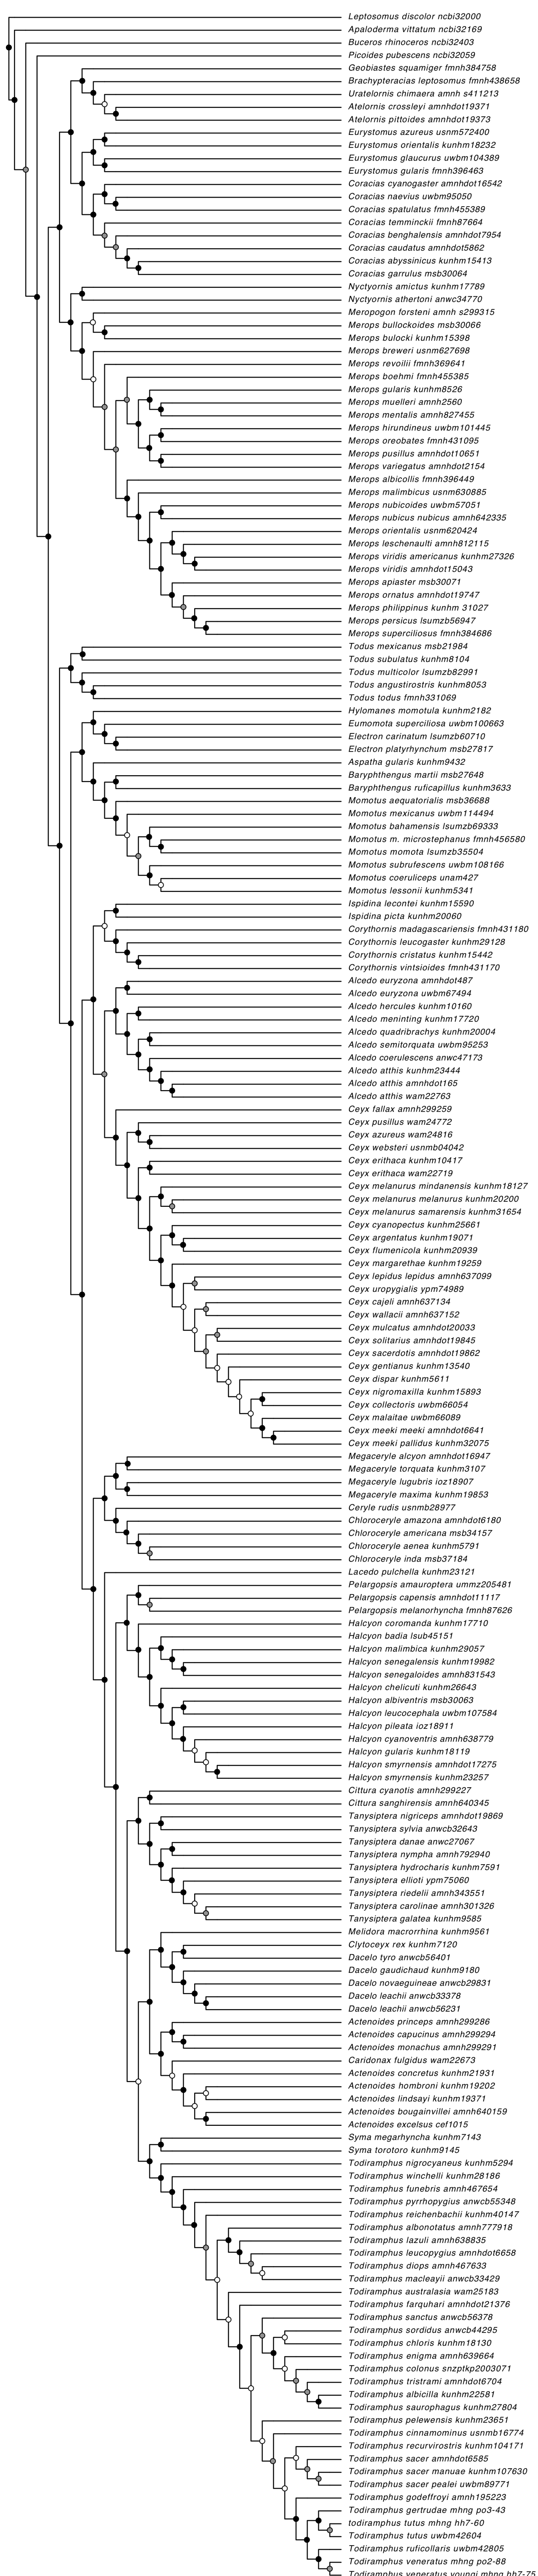

Supplement: Supplementary file 1 [file 17890664]
